# Supplementary material for: Experimental and computational study of Zn doping in Li5+xLa3Nb2−xZrxO12 garnet solid state electrolytes
Source: Royal Society of Chemistry journal article supplement (doi:10.1039/d4ma00429a), 2024-01-01
Supplement: d4ma00429a1.pdf [file d4ma00429a1.pdf]

## Experimental and Computational Study of Zn Doping in $\text{Li}_{5+x}\text{La}_3\text{Nb}_{2-x}\text{Zr}_x\text{O}_{12}$ Garnet Solid State Electrolytes

*Bo Dong*<sup>†,\*</sup>, *Bassey Oboho*<sup>‡</sup>, *Linhao Li*<sup>Σ</sup>, *Xiao Tao*<sup>§</sup>, *Pengcheng Zhu*<sup>†</sup>, *Mark P. Stockham*<sup>†</sup>, *Chuan Li*<sup>⊥</sup>, *Roger Smith*<sup>‡</sup>, *Yongliang Li*<sup>⊥</sup>,  
*Yulong Ding*<sup>⊥</sup>, *Pooja Goddard*<sup>‡,\*</sup>, *Peter R. Slater*<sup>†,\*</sup>

<sup>†</sup>*School of Chemistry, University of Birmingham, B15 2TT*

<sup>‡</sup>*Department of Chemistry, Loughborough University, Loughborough, LE11 3TU, UK*

<sup>Σ</sup>*Department of Materials Science and Engineering, University of Sheffield, S1 3JD*

<sup>§</sup>*School of Metallurgy and Materials, University of Birmingham, B15 2TT*

<sup>⊥</sup>*School of Chemical Engineering, University of Birmingham, B15 2TT*

[\\*b.dong@bham.ac.uk](mailto:b.dong@bham.ac.uk); [p.goddard@lboro.ac.uk](mailto:p.goddard@lboro.ac.uk); [p.r.slater@bham.ac.uk](mailto:p.r.slater@bham.ac.uk);

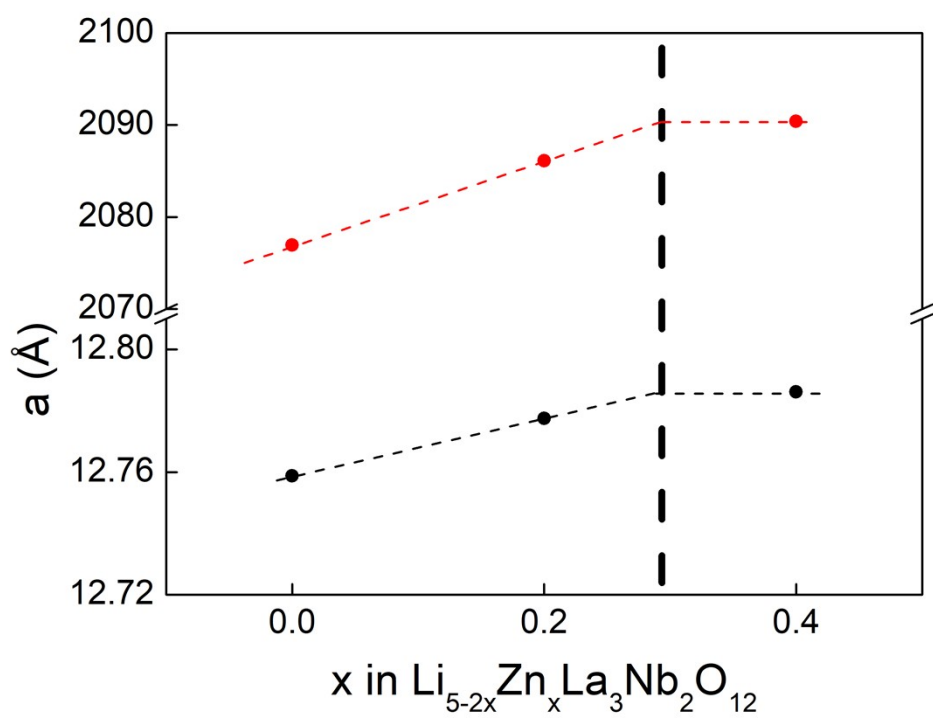

Figure S1 Variation of lattice parameter  $a$  and volume  $V$  for  $\text{Li}_{5-2y}\text{Zn}_y\text{La}_3\text{Nb}_2\text{O}_{12}$  with composition  $y$ .

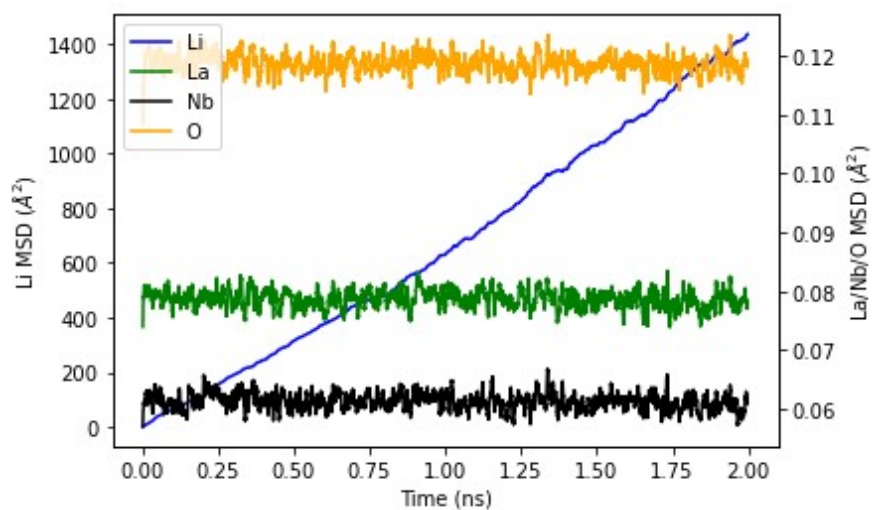

Figure S2: MSD against time for the pure LLNO system at 1100 K using an NVT ensemble for 2 ns.

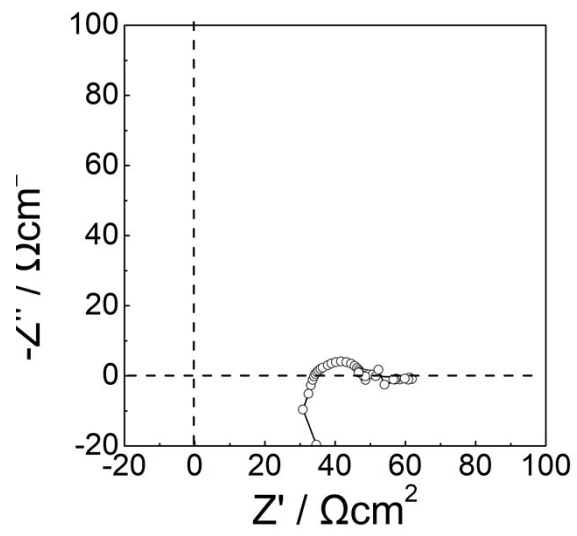

Figure S3 Electrochemical impedance spectra Li//LLZN//Li symmetric cell.

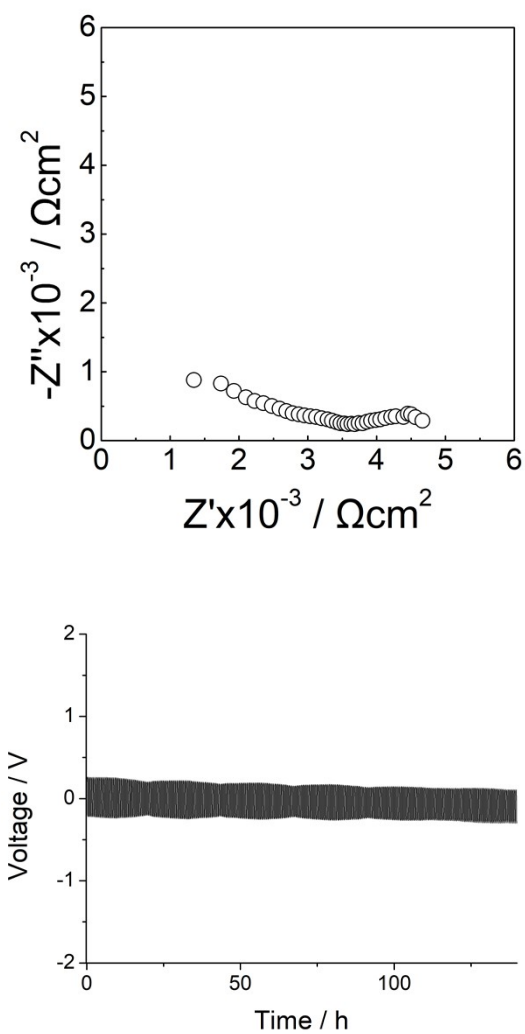

Figure S4 (a) Electrochemical impedance spectra of Li//LLZnZ-PTFE//Li symmetric cells. (b) Charge – discharge voltage profile of the Li//LLZnZ-PTFE//Li symmetry cell at room temperature with  $100 \mu\text{A cm}^{-2}$  current density.
